# Supplementary material for: The association of HLA-G polymorphisms and the synergistic effect of sMICA and sHLA-G with chronic kidney disease and allograft acceptance
Source: PubMed Central journal article supplement (PMC6386361; doi:10.1371/journal.pone.0212750), 2019-02-22
Supplement: pone.0212750.s001.pdf [file pone.0212750.s001.pdf]

**S1 Table. Analyses of Hardy-Weinberg equilibrium performed for *HLA-G* alleles and polymorphisms in 3'-UTR region, *MICA* and *NKG2D* variations in the control group (n = 75).**

| Locus                                | Observed heterozygosis | Expected heterozygosis | p     | SD     |
|--------------------------------------|------------------------|------------------------|-------|--------|
| <i>HLA-G</i> 3'-UTR polymorphisms    |                        |                        |       |        |
| <i>HLA-G</i> +2960                   | 0.547                  | 0.486                  | 0.341 | <0.001 |
| <i>HLA-G</i> +3003                   | 0.280                  | 0.261                  | 1.000 | <0.001 |
| <i>HLA-G</i> +3010                   | 0.507                  | 0.503                  | 1.000 | <0.001 |
| <i>HLA-G</i> +3027                   | 0.120                  | 0.114                  | 1.000 | <0.001 |
| <i>HLA-G</i> +3035                   | 0.147                  | 0.181                  | 0.144 | <0.001 |
| <i>HLA-G</i> +3142                   | 0.520                  | 0.502                  | 0.817 | <0.001 |
| <i>HLA-G</i> +3187                   | 0.373                  | 0.367                  | 1.000 | <0.001 |
| <i>HLA-G</i> +3196                   | 0.493                  | 0.433                  | 0.285 | <0.001 |
| <i>HLA-G</i> +3227                   | 0.133                  | 0.125                  | 1.000 | <0.001 |
| <i>HLA-G</i> UTRs                    | 0.867                  | 0.821                  | 0.387 | <0.001 |
| <i>HLA-G</i> alleles                 | 0.333                  | 0.356                  | 0.246 | <0.001 |
| <i>HLA-G</i> haplotypes <sup>1</sup> | 0.907                  | 0.85                   | 0.663 | <0.001 |
| <i>MICA</i> -129 Val/Met             | 0.653                  | 0.661                  | 0.309 | <0.001 |
| <i>MICA</i> A5.1/Wt                  | 0.333                  | 0.400                  | 0.156 | <0.001 |
| <i>MICA</i> haplotypes               | 0.533                  | 0.488                  | 0.480 | <0.001 |
| <i>NKG2D</i>                         | 0.507                  | 0.456                  | 0.443 | <0.001 |

Positions +3001, +3032, +3044, +3052, +3092, 3107, +3111 and +3121 are monomorphic sites in the control group. <sup>1</sup>*HLA-G* haplotypes: inferred composition through the ELB algorithm of *HLA-G* alleles with determined UTRs. *Wt*: wild type, which does not show *MICA* A5.1 variation. SD: Standard deviation.
