# Supplementary material for: The association of HLA-G polymorphisms and the synergistic effect of sMICA and sHLA-G with chronic kidney disease and allograft acceptance
Source: PubMed Central journal article supplement (PMC6386361; doi:10.1371/journal.pone.0212750), 2019-02-22
Supplement: pone.0212750.s002.pdf [file pone.0212750.s002.pdf]

**S2 Table. Observed allele frequencies and Fischer's Exact Test results for the *HLA-G*, *MICA* and *NKG2D* genes.**

| Position                | Variation                 | Ct - 2n = 150          | CKD - 2n = 188   |          | KTN - 2n = 72          | KTR - 2n = 56    |          |
|-------------------------|---------------------------|------------------------|------------------|----------|------------------------|------------------|----------|
| <b>HLA-G 3'-UTR</b>     |                           | Relative frequency (%) |                  | <i>p</i> | Relative frequency (%) |                  | <i>p</i> |
| +2960                   | 14-bp <i>Del</i>          | 59.30                  | 62.80            | 0.574    | 62.50                  | 62.50            | 1.000    |
|                         | 14-bp <i>Ins</i>          | 40.70                  | 37.20            | 0.520    | 37.50                  | 37.50            | 1.000    |
| +3001                   | <i>C</i>                  | 100.00                 | 99.50            | 0.371    | --- <sup>1</sup>       | --- <sup>1</sup> | ---      |
|                         | <i>T</i>                  | 0.00                   | 0.50             | 1.000    | --- <sup>1</sup>       | --- <sup>1</sup> | ---      |
| +3003                   | <i>C</i>                  | 15.30                  | 10.10            | 0.148    | 11.10                  | 8.80             | 0.774    |
|                         | <i>T</i>                  | 84.70                  | 90.90            | 0.184    | 88.90                  | 91.20            | 0.685    |
| +3010                   | <i>G</i>                  | 49.30                  | 46.30            | 0.576    | 45.80                  | 55.60            | 0.373    |
|                         | <i>C</i>                  | 50.70                  | 53.70            | 0.586    | 54.20                  | 44.40            | 0.893    |
| +3027                   | <i>C</i>                  | 94.00                  | 95.70            | 0.618    | 94.40                  | 96.40            | 1.000    |
|                         | <i>A</i>                  | 6.00                   | 4.30             | 0.466    | 5.60                   | 5.60             | 1.000    |
| +3032                   | <i>G</i>                  | 100.00                 | 98.90            | 0.205    | --- <sup>1</sup>       | --- <sup>1</sup> | ---      |
|                         | <i>C</i>                  | 0.00                   | 1.10             | 1.000    | --- <sup>1</sup>       | --- <sup>1</sup> | ---      |
| +3035                   | <i>C</i>                  | 90.00                  | 87.80            | 0.518    | 87.50                  | 91.10            | 0.521    |
|                         | <i>T</i>                  | 10.00                  | 12.20            | 0.604    | 12.50                  | 8.90             | 0.580    |
| +3142                   | <i>C</i>                  | 47.30                  | 47.30            | 0.999    | 45.80                  | 48.20            | 0.789    |
|                         | <i>G</i>                  | 52.70                  | 52.70            | 0.999    | 54.20                  | 51.80            | 0.859    |
| +3187                   | <i>A</i>                  | 76.00                  | 67.60            | 0.088    | 70.80                  | 66.10            | 0.701    |
|                         | <i>G</i>                  | 24.00                  | 32.40            | 0.092    | 29.20                  | 33.90            | 0.564    |
| +3196                   | <i>C</i>                  | 68.70                  | 72.3             | 0.473    | 69.40                  | 69.60            | 0.981    |
|                         | <i>G</i>                  | 31.30                  | 27.70            | 0.461    | 30.60                  | 30.40            | 1.000    |
| +3227                   | <i>G</i>                  | 93.30                  | 97.30            | 0.109    | 95.80                  | 98.20            | 0.443    |
|                         | <i>A</i>                  | 6.70                   | 2.70             | 0.075    | 4.20                   | 1.80             | 0.631    |
| <b>HLA-G UTR</b>        |                           |                        |                  |          |                        |                  |          |
|                         | UTR-1                     | 24.00                  | 29.26            | 0.324    | 29.17                  | 25.00            | 1.000    |
|                         | UTR-2                     | 28.67                  | 22.87            | 0.168    | 23.61                  | 23.21            | 1.000    |
|                         | UTR-3                     | 10.67                  | 14.36            | 0.396    | 15.28                  | 12.50            | 0.799    |
|                         | UTR-4                     | 15.33                  | 8.51             | 0.060    | 8.33                   | 8.93             | 1.000    |
|                         | UTR-18                    | 2.10                   | 6.70             | 0.053    | --- <sup>1</sup>       | --- <sup>1</sup> | ---      |
| <b>HLA-G Alleles</b>    |                           |                        |                  |          |                        |                  |          |
|                         | <i>HLA-G*01:01</i>        | 79.33                  | 77.13            | 0.692    | 0.79                   | 0.79             | 1.000    |
|                         | <i>HLA-G*01:03</i>        | 4.00                   | 6.38             | 0.466    | 0.07                   | 0.02             | 0.230    |
|                         | <i>HLA-G*01:04</i>        | 10.67                  | 12.77            | 0.613    | 0.08                   | 0.02             | 0.268    |
|                         | <i>HLA-G*01:06</i>        | 6.00                   | 3.19             | 0.288    | 0.04                   | 0.04             | 0.268    |
|                         | <i>HLA-G*01:22</i>        | 0.00                   | 0.53             | 1.000    | 0.01                   | 0.00             | 1.000    |
| <b>HLA-G Haplotypes</b> |                           |                        |                  |          |                        |                  |          |
|                         | <i>HLA-G*01:01</i> UTR-1  | 22.67                  | 24.47            | 0.702    | 25.00                  | 23.21            | 0.839    |
|                         | <i>HLA-G*01:01</i> UTR-2  | 21.33                  | 20.74            | 1.000    | 19.44                  | 25.00            | 0.520    |
|                         | <i>HLA-G*01:01</i> UTR-3  | 4.00                   | 6.38             | 0.466    | 4.17                   | 7.14             | 0.698    |
|                         | <i>HLA-G*01:01</i> UTR-4  | 14.67                  | 7.45             | 0.035    | 9.72                   | 7.14             | 0.755    |
|                         | <i>HLA-G*01:04</i> UTR-3  | 5.33                   | 5.85             | 1.000    | 6.94                   | 5.36             | 1.000    |
|                         | <i>HLA-G*01:04</i> UTR-1  | --- <sup>1</sup>       | --- <sup>1</sup> | ---      | 0.00                   | 7.10             | 0.002    |
| <b>MICA</b>             |                           |                        |                  |          |                        |                  |          |
|                         | <i>MICA-129 Val</i>       | 58.70                  | 65.40            | 0.215    | 65.3                   | 53.60            | 0.205    |
|                         | <i>MICA-129 Met</i>       | 41.30                  | 34.60            | 0.202    | 34.70                  | 46.40            | 0.180    |
|                         | <i>MICA A5.1</i>          | 27.30                  | 26.00            | 0.793    | 70.80                  | 82.10            | 0.138    |
|                         | <i>MICA Wt</i>            | 72.70                  | 74.00            | 0.805    | 29.20                  | 17.9             | 0.152    |
| <b>MICA Haplotype</b>   |                           |                        |                  |          |                        |                  |          |
|                         | <i>MICA-129 Met/ Wt</i>   | 41.33                  | 34.57            | 0.215    | 34.70                  | 46.40            | 0.280    |
|                         | <i>MICA-129 Val/ Wt</i>   | 31.33                  | 39.36            | 0.139    | 36.10                  | 35.70            | 1.000    |
|                         | <i>MICA-129 Val/ A5.1</i> | 27.33                  | 26.06            | 0.805    | 29.20                  | 17.90            | 0.152    |
| <b>NKG2D</b>            |                           |                        |                  |          |                        |                  |          |
|                         | <i>LNKI</i>               | 65.33                  | 65.33            | 0.571    | 58.33                  | 60.71            | 0.857    |
|                         | <i>HNKI</i>               | 34.67                  | 34.67            | 0.571    | 41.67                  | 39.29            | 0.857    |

Ct: Control group. CKD: Patients with chronic kidney disease. KTN: Kidney-transplant patients with no rejection. KTR: Kidney-transplant patients who developed episodes of rejection. *Wt*: wild type, which does not show *MICA A5.1* variation. *Del*: +2960 or 14-bp deletion and *Ins*: +2960 or 14-bp insertion. <sup>1</sup> Zero or not sufficient frequency to perform the calculation.
