# Supplementary material for: The association of HLA-G polymorphisms and the synergistic effect of sMICA and sHLA-G with chronic kidney disease and allograft acceptance
Source: PubMed Central journal article supplement (PMC6386361; doi:10.1371/journal.pone.0212750), 2019-02-22
Supplement: pone.0212750.s003.pdf [file pone.0212750.s003.pdf]

**S3 Table. Observed genotype frequencies and Fischer's Exact Test results for *HLA-G*, *MICA* and *NKG2D* genes.**

| Position                           | Genotype                            | Ct - n = 75            | CKD - n = 94 |       | KTN - n = 36 | KTR - n = 28           |        |          |
|------------------------------------|-------------------------------------|------------------------|--------------|-------|--------------|------------------------|--------|----------|
| <i>HLA-G</i> genotypes with 3'-UTR |                                     | Relative frequency (%) |              |       | <i>p</i>     | Relative frequency (%) |        | <i>p</i> |
| +2960                              | 14-bp <i>Del</i> / 14-bp <i>Del</i> | 32.00                  | 40.43        | 0.267 | 41.67        | 39.29                  | 1.000  |          |
|                                    | 14-bp <i>Del</i> / 14-bp <i>Ins</i> | 54.67                  | 44.68        | 0.218 | 41.67        | 46.43                  | 0.801  |          |
|                                    | 14-bp <i>Ins</i> / 14-bp <i>Ins</i> | 13.30                  | 14.89        | 0.827 | 16.67        | 14.29                  | 1.000  |          |
| +3001                              | <i>C/C</i>                          | 100.00                 | 98.94        | 1.000 | 100.00       | 100.00                 | ---    |          |
|                                    | <i>C/T</i>                          | 0.00                   | 1.06         | 1.000 | 0.00         | 0.00                   | ---    |          |
|                                    | <i>T/T</i>                          | 0.00                   | 0.00         | ---   | 0.00         | 0.00                   | ---    |          |
| +3003                              | <i>C/C</i>                          | 1.33                   | 1.06         | 1.000 | 2.78         | 0.00                   | 1.000  |          |
|                                    | <i>C/T</i>                          | 28.00                  | 18.09        | 0.141 | 16.67        | 17.86                  | 1.000  |          |
|                                    | <i>T/T</i>                          | 70.68                  | 80.85        | 0.146 | 80.56        | 82.14                  | 1.000  |          |
| +3010                              | <i>G/G</i>                          | 24.00                  | 23.40        | 1.000 | 33.33        | 10.71                  | 0.041  |          |
|                                    | <i>G/C</i>                          | 50.67                  | 45.74        | 0.539 | 25.00        | 67.86                  | <0.001 |          |
|                                    | <i>C/C</i>                          | 25.33                  | 30.90        | 0.494 | 41.67        | 21.43                  | 0.111  |          |
| +3027                              | <i>C/C</i>                          | 88.00                  | 91.49        | 0.608 | 88.89        | 92.86                  | 0.688  |          |
|                                    | <i>C/A</i>                          | 12.00                  | 8.51         | 0.608 | 11.11        | 7.14                   | 0.688  |          |
|                                    | <i>A/A</i>                          | 0.00                   | 0.00         | ---   | 0.00         | 0.00                   | ---    |          |
| +3032                              | <i>G/G</i>                          | 100.00                 | 98.94        | 1.000 | 100.00       | 100.00                 | ---    |          |
|                                    | <i>G/C</i>                          | 0.00                   | 0.00         | ---   | 0.00         | 0.00                   | ---    |          |
|                                    | <i>C/C</i>                          | 0.00                   | 1.06         | 1.000 | 0.00         | 0.00                   | ---    |          |
| +3035                              | <i>C/C</i>                          | 82.67                  | 79.79        | 0.696 | 80.56        | 85.71                  | 0.743  |          |
|                                    | <i>C/T</i>                          | 14.67                  | 15.96        | 0.834 | 13.89        | 10.71                  | 1.000  |          |
|                                    | <i>T/T</i>                          | 2.67                   | 4.26         | 0.694 | 5.56         | 3.57                   | 1.000  |          |
| +3142                              | <i>G/G</i>                          | 26.67                  | 29.79        | 0.732 | 41.67        | 17.86                  | 0.058  |          |
|                                    | <i>G/C</i>                          | 52.00                  | 45.74        | 0.442 | 25.00        | 67.86                  | <0.001 |          |
|                                    | <i>C/C</i>                          | 21.33                  | 24.47        | 0.714 | 33.33        | 14.29                  | 0.144  |          |
| +3187                              | <i>G/G</i>                          | 5.33                   | 13.83        | 0.077 | 16.67        | 7.14                   | 0.448  |          |
|                                    | <i>G/A</i>                          | 37.33                  | 37.23        | 1.000 | 25.00        | 53.57                  | 0.036  |          |
|                                    | <i>A/A</i>                          | 57.33                  | 48.94        | 0.283 | 58.33        | 39.29                  | 0.207  |          |
| +3196                              | <i>G/G</i>                          | 6.67                   | 9.57         | 0.582 | 11.11        | 10.71                  | 1.000  |          |
|                                    | <i>G/C</i>                          | 49.33                  | 36.17        | 0.117 | 38.89        | 39.29                  | 1.000  |          |
|                                    | <i>C/C</i>                          | 44.00                  | 54.26        | 0.216 | 50.00        | 50.00                  | 1.000  |          |
| +3227                              | <i>G/G</i>                          | 86.67                  | 94.68        | 0.101 | 91.67        | 96.43                  | 0.625  |          |
|                                    | <i>G/A</i>                          | 13.33                  | 5.32         | 0.101 | 8.33         | 3.57                   | 0.625  |          |
|                                    | <i>A/A</i>                          | 0.00                   | 0.00         | ---   | 0.00         | 0.00                   | ---    |          |
| <i>HLA-G</i> genotypes with UTRs   |                                     |                        |              |       |              |                        |        |          |
|                                    | UTR-1/ UTR-1                        | 5.33                   | 11.70        | 0.180 | 16.67        | 0.00                   | 0.031  |          |
|                                    | UTR-1/ UTR-2                        | 13.33                  | 11.70        | 0.817 | 5.56         | 21.43                  | 0.124  |          |
|                                    | UTR-1/ UTR-3                        | 6.67                   | 9.57         | 0.582 | 2.78         | 17.86                  | 0.078  |          |
|                                    | UTR-1/ UTR-4                        | 9.33                   | 6.38         | 0.566 | 11.11        | 3.57                   | 0.375  |          |
|                                    | UTR-1/ UTR-5                        | 0.00                   | 3.19         | 0.255 | 0.00         | 0.00                   | ---    |          |
|                                    | UTR-1/ UTR-6                        | 1.33                   | 2.13         | 1.000 | 2.78         | 3.57                   | 1.000  |          |
|                                    | UTR-1/ UTR-7                        | 1.33                   | 1.06         | 1.000 | 0.00         | 3.57                   | 0.437  |          |
|                                    | UTR-1/ UTR-8                        | 2.67                   | 0.00         | 0.195 | 0.00         | 0.00                   | ---    |          |
|                                    | UTR-1/ UTR-10                       | 0.00                   | 1.06         | 1.000 | 2.78         | 0.00                   | 1.000  |          |
|                                    | UTR-1/ UTR-16                       | 0.00                   | 1.06         | 1.000 | 0.00         | 3.57                   | 0.437  |          |
|                                    | UTR-1/ UTR-18                       | 2.67                   | 0.00         | 0.195 | 0.00         | 0.00                   | ---    |          |
|                                    | UTR-1/ UTR-51                       | 0.00                   | 1.06         | 1.000 | 2.78         | 0.00                   | 1.000  |          |
|                                    | UTR-2/ UTR-2                        | 5.33                   | 6.38         | 1.000 | 2.78         | 10.71                  | 0.310  |          |
|                                    | UTR-2/ UTR-3                        | 9.33                   | 8.51         | 1.000 | 8.33         | 7.14                   | 1.000  |          |
|                                    | UTR-2/ UTR-4                        | 10.67                  | 5.32         | 0.249 | 5.56         | 7.14                   | 1.000  |          |
|                                    | UTR-2/ UTR-5                        | 2.67                   | 1.06         | 0.585 | 0.00         | 0.00                   | ---    |          |
|                                    | UTR-2/ UTR-6                        | 1.33                   | 1.06         | 1.000 | 0.00         | 3.57                   | 0.437  |          |
|                                    | UTR-2/ UTR-7                        | 1.33                   | 3.19         | 0.630 | 5.56         | 3.57                   | 1.000  |          |
|                                    | UTR-2/ UTR-10                       | 1.33                   | 2.13         | 1.000 | 5.56         | 0.00                   | 0.500  |          |
|                                    | UTR-2/ UTR-18                       | 6.67                   | 3.19         | 0.469 | 5.56         | 0.00                   | 0.500  |          |
|                                    | UTR-2/ UTR-50                       | 0.00                   | 1.06         | 1.000 | 2.78         | 0.00                   | 1.000  |          |
|                                    | UTR-3/ UTR-3                        | 1.33                   | 1.06         | 1.000 | 2.78         | 0.00                   | 1.000  |          |
|                                    | UTR-3/ UTR-4                        | 2.67                   | 3.19         | 1.000 | 0.00         | 3.57                   | 0.437  |          |
|                                    | UTR-3/ UTR-5                        | 0.00                   | 1.06         | 1.000 | 2.78         | 0.00                   | 1.000  |          |
|                                    | UTR-3/ UTR-7                        | 0.00                   | 1.06         | 1.000 | 0.00         | 0.00                   | ---    |          |
|                                    | UTR-3/ UTR-18                       | 0.00                   | 1.06         | 1.000 | 0.00         | 3.57                   | 0.437  |          |
|                                    | UTR-4/ UTR-4                        | 1.33                   | 1.06         | 1.000 | 2.78         | 0.00                   | 1.000  |          |
|                                    | UTR-4/ UTR-5                        | 0.00                   | 2.13         | 0.503 | 0.00         | 3.57                   | 0.437  |          |
|                                    | UTR-4/ UTR-7                        | 4.00                   | 0.00         | 0.085 | 0.00         | 0.00                   | ---    |          |
|                                    | UTR-4/ UTR-18                       | 1.33                   | 0.00         | 0.444 | 0.00         | 0.00                   | ---    |          |
|                                    | UTR-5/ UTR-7                        | 1.33                   | 3.19         | 0.630 | 2.78         | 3.57                   | 1.000  |          |
|                                    | UTR-5/ UTR-8                        | 1.33                   | 0.00         | 0.444 | 0.00         | 0.00                   | ---    |          |
|                                    | UTR-5/ UTR-13                       | 1.33                   | 1.06         | 1.000 | 2.78         | 0.00                   | 1.000  |          |
|                                    | UTR-5/ UTR-18                       | 0.00                   | 1.06         | 1.000 | 2.78         | 0.00                   | 1.000  |          |
|                                    | UTR-6/ UTR-17                       | 0.00                   | 1.06         | 1.000 | 0.00         | 0.00                   | ---    |          |
|                                    | UTR-6/ UTR-18                       | 0.00                   | 1.06         | 1.000 | 2.78         | 0.00                   | 1.000  |          |
|                                    | UTR-7/ UTR-15                       | 1.33                   | 0.00         | 0.444 | 0.00         | 0.00                   | ---    |          |
|                                    | UTR-7/ UTR-18                       | 2.67                   | 0.00         | 0.195 | 0.00         | 0.00                   | ---    |          |
|                                    | UTR-47/ UTR-48                      | 0.00                   | 1.06         | 0.444 | 0.00         | 0.00                   | ---    |          |

Ct: Control group. CKD: Patients with chronic kidney disease. KTN: Kidney-transplant patients with no rejection. KTR: Kidney-transplant patients who developed episodes of rejection. *Wt*: wild type, which does not show *MICA* A5.1 variation. *Del*: +2960 or 14-bp deletion and *Ins*: +2960 or 14-bp insertion.

**S3 Table. Observed genotype frequencies and Fischer's Exact Test results for *HLA-G*, *MICA* and *NKG2D* genes (continuation).**

| Position                                     | Genotype                                            | Ct - n = 75 | CKD - n = 94 |       | KTN - n = 36 | KTR - n = 28 |       |
|----------------------------------------------|-----------------------------------------------------|-------------|--------------|-------|--------------|--------------|-------|
| <b><i>HLA-G</i> genotypes with alleles</b>   |                                                     |             |              |       |              |              |       |
|                                              | <i>HLA-G*01:01/HLA-G*01:01</i>                      | 64.00       | 60.64        | 0.750 | 66.67        | 64.29        | 1.000 |
|                                              | <i>HLA-G*01:01/HLA-G*01:03</i>                      | 5.33        | 9.57         | 0.390 | 5.56         | 3.57         | 1.000 |
|                                              | <i>HLA-G*01:01/HLA-G*01:04</i>                      | 16.00       | 17.02        | 1.000 | 8.33         | 17.86        | 0.448 |
|                                              | <i>HLA-G*01:01/HLA-G*01:06</i>                      | 9.33        | 5.32         | 0.374 | 8.33         | 7.14         | 1.000 |
|                                              | <i>HLA-G*01:01/HLA-G*01:22</i>                      | 0.00        | 1.06         | 1.000 | 2.78         | 0.00         | 1.000 |
|                                              | <i>HLA-G*01:03/HLA-G*01:03</i>                      | 1.33        | 1.06         | 1.000 | 2.78         | 0.00         | 1.000 |
|                                              | <i>HLA-G*01:03/HLA-G*01:04</i>                      | 0.00        | 1.06         | 1.000 | 2.78         | 0.00         | 1.000 |
|                                              | <i>HLA-G*01:04/HLA-G*01:04</i>                      | 1.33        | 3.19         | 0.630 | 2.78         | 7.14         | 0.577 |
|                                              | <i>HLA-G*01:04/HLA-G*01:06</i>                      | 2.67        | 1.06         | 0.585 | 0.00         | 0.00         | ---   |
| <b><i>MICA-129 Val/ Met</i> genotypes</b>    |                                                     |             |              |       |              |              |       |
|                                              | <i>MICA-129 Val/ Val</i>                            | 32.00       | 46.81        | 0.059 | 41.67        | 32.14        | 0.603 |
|                                              | <i>MICA-129 Val/ Met</i>                            | 53.33       | 37.23        | 0.043 | 47.22        | 42.86        | 0.803 |
|                                              | <i>MICA-129 Met/ Met</i>                            | 14.67       | 15.96        | 0.834 | 11.11        | 25.00        | 0.188 |
| <b><i>MICA A5.1/Wt</i> genotypes</b>         |                                                     |             |              |       |              |              |       |
|                                              | <i>MICA A5.1/ A5.1</i>                              | 10.67       | 8.51         | 0.792 | 5.56         | 3.57         | 1.000 |
|                                              | <i>MICA A5.1/ Wt</i>                                | 33.33       | 35.11        | 0.871 | 47.22        | 28.57        | 0.197 |
|                                              | <i>MICA Wt/ Wt</i>                                  | 56.00       | 56.38        | 1     | 47.22        | 67.86        | 0.208 |
| <b><i>MICA</i> genotypes with haplotypes</b> |                                                     |             |              |       |              |              |       |
|                                              | <i>MICA Wt/Wt</i> and <i>MICA-129 Met/ Met</i>      | 14.67       | 15.96        | 0.834 | 11.11        | 25.00        | 0.188 |
|                                              | <i>MICA Wt/A5.1</i> and <i>MICA-129 Met/Val</i>     | 21.33       | 14.89        | 0.314 | 22.22        | 10.71        | 0.322 |
|                                              | <i>MICA Wt/A5.1</i> and <i>MICA-129 Val/Val</i>     | 12.00       | 20.21        | 0.211 | 25.00        | 17.86        | 0.555 |
|                                              | <i>MICA Wt/ Wt</i> and <i>MICA-129 Val/ Val</i>     | 9.33        | 18.09        | 0.124 | 11.11        | 10.71        | 1.000 |
|                                              | <i>MICA A5.1/ A5.1</i> and <i>MICA-129 Val/ Val</i> | 10.67       | 8.51         | 0.792 | 5.56         | 3.57         | 1.000 |
|                                              | <i>MICA Wt/Wt</i> and <i>MICA-129 Met/ Val</i>      | 32.00       | 22.34        | 0.166 | 25.00        | 32.14        | 0.583 |
| <b><i>NKG2D</i> genotypes</b>                |                                                     |             |              |       |              |              |       |
|                                              | <i>LNK1/ LNK1</i>                                   | 40.00       | 40.43        | 1.000 | 33.33        | 39.29        | 0.793 |
|                                              | <i>LNK1/ HNK1</i>                                   | 50.67       | 43.62        | 0.438 | 50.00        | 42.86        | 0.620 |
|                                              | <i>HNK1/ HNK1</i>                                   | 9.33        | 15.96        | 0.253 | 16.67        | 17.86        | 1.000 |

Ct: Control group. CKD: Patients with chronic kidney disease. KTN: Kidney-transplant patients with no rejection. KTR: Kidney-transplant patients who developed episodes of rejection. *Wt*: wild type, which does not show *MICA A5.1* variation. *Del*: +2960 or 14-bp deletion and *Ins*: +2960 or 14-bp insertion.
