# Supplementary material for: The association of HLA-G polymorphisms and the synergistic effect of sMICA and sHLA-G with chronic kidney disease and allograft acceptance
Source: PubMed Central journal article supplement (PMC6386361; doi:10.1371/journal.pone.0212750), 2019-02-22
Supplement: pone.0212750.s004.pdf [file pone.0212750.s004.pdf]

**S4 Table. Predicted probability of rejection for kidney transplant patients.**

| Case number | <i>HLA-G +3010 CG</i><br>score $\beta = 1.664$ | <i>HLA-G +3010 GG</i><br>score $\beta = -0.470$ | Intercept = -0.916 | Predicted probability of rejection<br>for kidney transplant patients | Actual outcome<br>(1 = Yes, 0 = No) |
|-------------|------------------------------------------------|-------------------------------------------------|--------------------|----------------------------------------------------------------------|-------------------------------------|
| TXR01       | 0                                              | 0                                               | -0.916             | -0.916                                                               | 0                                   |
| TXR02       | <i>GC</i>                                      | 0                                               | -0.916             | 0.084                                                                | 1                                   |
| TXR03       | <i>GC</i>                                      | 0                                               | -0.916             | 0.084                                                                | 1                                   |
| TXR04       | 0                                              | <i>GG</i>                                       | -0.916             | 0.084                                                                | 1                                   |
| TXR05       | 0                                              | 0                                               | -0.916             | -0.916                                                               | 0                                   |
| TXR06       | <i>GC</i>                                      | 0                                               | -0.916             | 0.084                                                                | 1                                   |
| TXR07       | <i>GC</i>                                      | 0                                               | -0.916             | 0.084                                                                | 1                                   |
| TXR08       | <i>GC</i>                                      | 0                                               | -0.916             | 0.084                                                                | 0                                   |
| TXR09       | <i>GC</i>                                      | 0                                               | -0.916             | 0.084                                                                | 1                                   |
| TXR11       | 0                                              | <i>GG</i>                                       | -0.916             | 0.084                                                                | 0                                   |
| TXR13       | 0                                              | <i>GG</i>                                       | -0.916             | 0.084                                                                | 0                                   |
| TXR14       | 0                                              | 0                                               | -0.916             | -0.916                                                               | 0                                   |
| TXR15       | 0                                              | 0                                               | -0.916             | -0.916                                                               | 0                                   |
| TXR16       | 0                                              | 0                                               | -0.916             | -0.916                                                               | 1                                   |
| TXR17       | 0                                              | <i>GG</i>                                       | -0.916             | 0.084                                                                | 0                                   |
| TXR18       | 0                                              | <i>GG</i>                                       | -0.916             | 0.084                                                                | 0                                   |
| TXR19       | 0                                              | <i>GG</i>                                       | -0.916             | 0.084                                                                | 0                                   |
| TXR20       | 0                                              | 0                                               | -0.916             | -0.916                                                               | 1                                   |
| TXR21       | 0                                              | 0                                               | -0.916             | -0.916                                                               | 0                                   |
| TXR22       | <i>GC</i>                                      | 0                                               | -0.916             | 0.084                                                                | 0                                   |
| TXR23       | 0                                              | 0                                               | -0.916             | -0.916                                                               | 0                                   |
| TXR24       | <i>GC</i>                                      | 0                                               | -0.916             | 0.084                                                                | 1                                   |
| TXR25       | 0                                              | 0                                               | -0.916             | -0.916                                                               | 0                                   |
| TXR26       | <i>GC</i>                                      | 0                                               | -0.916             | 0.084                                                                | 1                                   |
| TXR27       | <i>GC</i>                                      | 0                                               | -0.916             | 0.084                                                                | 0                                   |
| TXR28       | 0                                              | 0                                               | -0.916             | -0.916                                                               | 0                                   |
| TXR29       | 0                                              | <i>GG</i>                                       | -0.916             | 0.084                                                                | 0                                   |
| TXR30       | 0                                              | 0                                               | -0.916             | -0.916                                                               | 0                                   |
| TXR31       | <i>GC</i>                                      | 0                                               | -0.916             | 0.084                                                                | 0                                   |
| TXR32       | <i>GC</i>                                      | 0                                               | -0.916             | 0.084                                                                | 0                                   |
| TXR33       | <i>GC</i>                                      | 0                                               | -0.916             | 0.084                                                                | 1                                   |
| TXR34       | 0                                              | 0                                               | -0.916             | -0.916                                                               | 1                                   |
| TXR35       | <i>GC</i>                                      | 0                                               | -0.916             | 0.084                                                                | 1                                   |
| TXR36       | <i>GC</i>                                      | 0                                               | -0.916             | 0.084                                                                | 1                                   |
| TXR37       | <i>GC</i>                                      | 0                                               | -0.916             | 0.084                                                                | 1                                   |
| TXR38       | 0                                              | <i>GG</i>                                       | -0.916             | 0.084                                                                | 0                                   |
| TXR39       | <i>GC</i>                                      | 0                                               | -0.916             | 0.084                                                                | 0                                   |
| TXR40       | <i>GC</i>                                      | 0                                               | -0.916             | 0.084                                                                | 1                                   |
| TXR41       | <i>GC</i>                                      | 0                                               | -0.916             | 0.084                                                                | 1                                   |
| TXR42       | <i>GC</i>                                      | 0                                               | -0.916             | 0.084                                                                | 1                                   |
| TXR43       | 0                                              | 0                                               | -0.916             | -0.916                                                               | 0                                   |
| TXR44       | 0                                              | 0                                               | -0.916             | -0.916                                                               | 0                                   |
| TXR45       | 0                                              | <i>GG</i>                                       | -0.916             | 0.084                                                                | 1                                   |
| TXR47       | 0                                              | 0                                               | -0.916             | -0.916                                                               | 0                                   |
| TXR48       | 0                                              | 0                                               | -0.916             | -0.916                                                               | 0                                   |
| TXR49       | <i>GC</i>                                      | 0                                               | -0.916             | 0.084                                                                | 0                                   |
| TXR50       | 0                                              | <i>GG</i>                                       | -0.916             | 0.084                                                                | 0                                   |
| TXR51       | 0                                              | <i>GG</i>                                       | -0.916             | 0.084                                                                | 0                                   |
| TXR52       | <i>GC</i>                                      | 0                                               | -0.916             | 0.084                                                                | 0                                   |
| TXR53       | 0                                              | 0                                               | -0.916             | -0.916                                                               | 1                                   |
| TXR54       | 0                                              | 0                                               | -0.916             | -0.916                                                               | 0                                   |
| TXR55       | 0                                              | 0                                               | -0.916             | -0.916                                                               | 1                                   |
| TXR56       | <i>GC</i>                                      | 0                                               | -0.916             | 0.084                                                                | 1                                   |
| TXR57       | <i>GC</i>                                      | 0                                               | -0.916             | 0.084                                                                | 1                                   |
| TXR58       | 0                                              | 0                                               | -0.916             | -0.916                                                               | 1                                   |
| TXR59       | 0                                              | <i>GG</i>                                       | -0.916             | 0.084                                                                | 1                                   |
| TXR60       | <i>GC</i>                                      | 0                                               | -0.916             | 0.084                                                                | 1                                   |
| TXR61       | <i>GC</i>                                      | 0                                               | -0.916             | 0.084                                                                | 1                                   |
| TXR62       | <i>GC</i>                                      | 0                                               | -0.916             | 0.084                                                                | 1                                   |
| TXR63       | 0                                              | <i>GG</i>                                       | -0.916             | 0.084                                                                | 0                                   |
| TXR64       | <i>GC</i>                                      | 0                                               | -0.916             | 0.084                                                                | 0                                   |
| TXR65       | 0                                              | <i>GG</i>                                       | -0.916             | 0.084                                                                | 0                                   |
| TXR66       | 0                                              | 0                                               | -0.916             | -0.916                                                               | 0                                   |
| TXR67       | 0                                              | <i>GG</i>                                       | -0.916             | 0.084                                                                | 0                                   |
