# Supplementary material for: The association of HLA-G polymorphisms and the synergistic effect of sMICA and sHLA-G with chronic kidney disease and allograft acceptance
Source: PubMed Central journal article supplement (PMC6386361; doi:10.1371/journal.pone.0212750), 2019-02-22
Supplement: pone.0212750.s006.pdf [file pone.0212750.s006.pdf]

**S6 Table. The linkage disequilibrium results for *HLA-G* 3'-UTR and *MICA* in each group (Ct, CKD, KTN and KTR).**

| Ct (n = 75)  |                       |        |        | CKD (n = 94)         |        |        |                       |          |
|--------------|-----------------------|--------|--------|----------------------|--------|--------|-----------------------|----------|
| <i>p</i>     | <i>r</i> <sup>2</sup> | D'     | UTR    | <i>HLA-G</i> alleles | UTR    | D'     | <i>r</i> <sup>2</sup> | <i>p</i> |
| 0.036        | 0.029                 | +0.790 | UTR-4  | <i>HLA-G*01:01</i>   | ---    | ---    | ---                   | ---      |
| <0.001       | 0.282                 | +0.583 | UTR-5  |                      | UTR-5  | +0.377 | 0.142                 | <0.001   |
| <0.001       | 0.161                 | +1.000 | UTR-13 | <i>HLA-G*01:03</i>   | UTR-13 | +0.225 | 0.033                 | 0.012    |
| 0.008        | 0.046                 | +0.306 | UTR-8  |                      | ---    | ---    | ---                   | ---      |
| <0.001       | 0.194                 | +0.440 | UTR-3  |                      | UTR-3  | +0.375 | 0.134                 | <0.001   |
| 0.003        | 0.056                 | +1.000 | UTR-15 | <i>HLA-G*01:04</i>   | ---    | ---    | ---                   | ---      |
| 0.01         | 0.044                 | +0.731 | UTR-1  |                      | ---    | ---    | ---                   | ---      |
| 0.009        | 0.045                 | +0.533 | UTR-2  | <i>HLA-G*01:06</i>   | UTR-10 | +0.225 | 0.033                 | 0.012    |
| KTN (n = 36) |                       |        |        | KTR (n = 28)         |        |        |                       |          |
| <i>p</i>     | <i>r</i> <sup>2</sup> | D'     | UTR    | <i>HLA-G</i> alleles | UTR    | D'     | <i>r</i> <sup>2</sup> | <i>p</i> |
| 0.04         | 0.058                 | +0.760 | UTR-1  | <i>HLA-G*01:01</i>   | ---    | ---    | ---                   | ---      |
| <0.001       | 0.422                 | +0.731 | UTR-5  |                      | UTR-5  | +1.000 | 0.491                 | <0.001   |
| <0.001       | 0.189                 | +1.000 | UTR-13 | <i>HLA-G*01:03</i>   | ---    | ---    | ---                   | ---      |
| <0.001       | 0.480                 | +0.813 | UTR-3  | <i>HLA-G*01:04</i>   | ---    | ---    | ---                   | ---      |
| 0.032        | 0.064                 | +0.294 | UTR-10 | <i>HLA-G*01:06</i>   | ---    | ---    | ---                   | ---      |

The inferences of *HLA-G* haplotype through ELB algorithm of *HLA-G* alleles with determined UTRs. Analysis performed in Arlequin. The significant linkage disequilibrium had a  $p < 0.05$ . Ct: Control group. CKD: Patients with chronic kidney disease. KTN: Kidney-transplant patients with no rejection. KTR: Kidney-transplant patients who developed episodes of rejection.
