# Supplementary material for: The association of HLA-G polymorphisms and the synergistic effect of sMICA and sHLA-G with chronic kidney disease and allograft acceptance
Source: PubMed Central journal article supplement (PMC6386361; doi:10.1371/journal.pone.0212750), 2019-02-22
Supplement: pone.0212750.s007.pdf [file pone.0212750.s007.pdf]

**S7 Table. Association analysis performed between soluble molecules and genetic factors.**

| sMICA and haplotypes                                                                       |                             | MICA-129 Met/ Wt MICA-129 Val/ Wt MICA-129 Val/ A5.1 |                |                |                    |               |       |
|--------------------------------------------------------------------------------------------|-----------------------------|------------------------------------------------------|----------------|----------------|--------------------|---------------|-------|
| n = 113<br>Kruskal-Wallis test = 0.327<br>Median (pg/mL) = 85.62<br>Q1-Q3 = 56.03 - 141.02 | n =                         | 23                                                   | 38             | 52             |                    |               |       |
|                                                                                            | Median (pg/mL) =            | 80.57                                                | 87.44          | 93.02          |                    |               |       |
|                                                                                            | Q1-Q3 =                     | 52.90 - 110.73                                       | 54.38 - 150.89 | 63.54 - 156.08 |                    |               |       |
|                                                                                            | Mann-Whitney U test results | ---                                                  | 0.319          | 0.140          | MICA-129 Met/ Wt   |               |       |
|                                                                                            |                             | ---                                                  | ---            | 0.581          | MICA-129 Val/ Wt   |               |       |
|                                                                                            |                             | ---                                                  | ---            | ---            | MICA-129 Val/ A5.1 |               |       |
| sHLA-G and alleles                                                                         |                             | HLA-G*01:01                                          | HLA-G*01:03    | HLA-G*01:04    |                    |               |       |
| n = 112<br>Kruskal-Wallis test = 0.448<br>Median (ng/mL) = 27.19<br>Q1-Q3 = 17.83 - 42.11  | n =                         | 85                                                   | 9              | 18             |                    |               |       |
|                                                                                            | Median (ng/mL) =            | 27.53                                                | 23.12          | 29.14          |                    |               |       |
|                                                                                            | Q1-Q3 =                     | 17.84 - 41.93                                        | 15.66 - 32.95  | 18.91 - 50.54  |                    |               |       |
|                                                                                            | Mann-Whitney U test results | ---                                                  | 0.352          | 0.468          | HLA-G*01:01        |               |       |
|                                                                                            |                             | ---                                                  | ---            | 0.208          | HLA-G*01:03        |               |       |
|                                                                                            |                             | ---                                                  | ---            | ---            | HLA-G*01:04        |               |       |
| sHLA-G and UTRs                                                                            |                             | UTR-1                                                | UTR-2          | UTR-3          | UTR-4              | UTR-5         |       |
| n = 99<br>Kruskal-Wallis test = 0.585<br>Median (ng/mL) = 26.64<br>Q1-Q3 = 17.59 - 42.28   | n =                         | 30                                                   | 27             | 25             | 9                  | 8             |       |
|                                                                                            | Median (ng/mL) =            | 27.53                                                | 24.29          | 28.79          | 20.87              | 21            |       |
|                                                                                            | Q1-Q3 =                     | 20.78 - 48.37                                        | 15.07 - 46.43  | 23.46 - 40.58  | 16.51 - 36.85      | 17.62 - 28.22 |       |
|                                                                                            | Mann-Whitney U test results | ---                                                  | 0.684          | 0.630          | 0.433              | 0.267         | UTR-1 |
|                                                                                            |                             | ---                                                  | ---            | 0.288          | 0.827              | 0.724         | UTR-2 |
|                                                                                            |                             | ---                                                  | ---            | ---            | 0.274              | 0.106         | UTR-3 |
|                                                                                            |                             | ---                                                  | ---            | ---            | ---                | 0.462         | UTR-4 |
|                                                                                            |                             | ---                                                  | ---            | ---            | ---                | ---           | UTR-5 |

Q1: First Quartile. Q3: Third Quartile.
